# Supplementary material
Source: HighWire-hosted journal article supplement (https://learnmem.cshlp.org/content/suppl/2023/11/03/30.11.282)
Supplement: Supplementary_Materials_.docx [file Supplementary_Materials_.docx]

***Supplementary Materials***

*Descriptive Statistics for Target Detection (Experiment 1-3)*

| Target TP | Accuracy Rate | |  | Reaction Time(ms) | |
| --- | --- | --- | --- | --- | --- |
| *Mean* | *SD* |  | *Mean* | *SD* |
| *Experiment 1* |  |  |  |  |  |
| High | 0.7 | 0.14 |  | 401 | 32 |
| Medium | 0.62 | 0.15 |  | 424 | 18 |
| Low | 0.58 | 0.18 |  | 438 | 16 |
|  |  |  |  |  |  |
| *Experiment 2* |  |  |  |  |  |
| High | 0.67 | 0.18 |  | 478 | 19 |
| Low | 0.63 | 0.18 |  | 482 | 20 |
|  |  |  |  |  |  |
| *Experiment 3* |  |  |  |  |  |
| High | 0.61 | 0.18 |  | 468 | 22 |
| Low | 0.59 | 0.17 |  | 474 | 21 |

*Descriptive Statistics for Probe Identification (Experiment 1-2)*

| Preceding Target TP | Cue Predictiveness | Accuracy Rate | |  | Reaction Time(ms) | |
| --- | --- | --- | --- | --- | --- | --- |
| *Mean* | *SD* |  | *Mean* | *SD* |
| *Experiment 1* |  |  |  |  |  |  |
| High | High | 0.81 | 0.14 |  | 1385 | 370 |
| Medium | 0.76 | 0.19 |  | 1432 | 357 |
| Low | 0.86 | 0.15 |  | 1349 | 303 |
|  |  |  |  |  |  |  |
| Medium | High | 0.81 | 0.16 |  | 1366 | 348 |
| Medium | 0.74 | 0.2 |  | 1533 | 607 |
| Low | 0.85 | 0.16 |  | 1344 | 359 |
|  |  |  |  |  |  |  |
| Low | High | 0.85 | 0.16 |  | 1452 | 867 |
| Medium | 0.76 | 0.2 |  | 1491 | 558 |
| Low | 0.8 | 0.2 |  | 1432 | 590 |
|  |  |  |  |  |  |  |
| *Experiment 2* |  |  |  |  |  |  |
| High | High | 0.78 | 0.18 |  | 1381 | 325 |
| Low | 0.81 | 0.18 |  | 1274 | 249 |
| Zero | 0.80 | 0.18 |  | 1283 | 218 |
|  |  |  |  |  |  |  |
| Low | High | 0.82 | 0.18 |  | 1292 | 311 |
| Low | 0.79 | 0.17 |  | 1343 | 278 |
| Zero | 0.79 | 0.18 |  | 1320 | 389 |

*Frequencies of Mean Target Recognition Accuracy Rate in Experiment 3*

| Mean Accuracy Rate | Frequency | Cumulative Frequency |
| --- | --- | --- |
| 0.15-0.19 | 3 | 3 |
| 0.20-0.24 | 4 | 7 |
| 0.25-0.29 | 2 | 9 |
| 0.30-0.34 | 6 | 15 |
| 0.35-0.39 | 6 | 21 |
| 0.40-0.44 | 3 | 24 |
| 0.45-0.49 | 0 | 24 |
| 0.50-0.54 | 1 | 25 |
| 0.55-0.59 | 2 | 27 |
| 0.60-0.64 | 1 | 28 |
| 0.65-0.69 | 0 | 28 |
| 0.70-0.74 | 2 | 30 |

*Marginal Effect Estimation for Probe Identification in Experiment 3*

| Awareness | Preceding target TP | Cue Predictiveness | Block Trend (Mean) | Block Trend (SE) |
| --- | --- | --- | --- | --- |
| Above-Chance | High | High | -0.02 | 0.08 |
|  |  | Low | 0.12 | 0.04 |
| Zero | 0.19 | 0.06 |
|  |  |  |  |
| Low | High | 0.22 | 0.11 |
| Low | 0.00 | 0.07 |
| Zero | -0.11 | 0.10 |
|  |  |  |  |  |
| Not Above-Chance | High | High | 0.05 | 0.08 |
| Low | 0.09 | 0.04 |
| Zero | 0.10 | 0.05 |
|  |  |  |  |
| Low | High | 0.04 | 0.10 |
| Low | 0.07 | 0.06 |
| Zero | 0.09 | 0.09 |
